# Supplementary material for: Epilepsy and sudden unexpected death in epilepsy in a mouse model of human SCN1B-linked developmental and epileptic encephalopathy
Source: PubMed Central journal article supplement (PMC10903178; doi:10.1093/braincomms/fcad283), 2023-10-20
Supplement: fcad283_Supplementary_Data.pdf [file fcad283_Supplementary_Data.pdf]

## SUPPLEMENTARY MATERIAL

### **Epilepsy and SUDEP in a mouse model of human *SCN1B*-linked Developmental and Epileptic Encephalopathy**

Chunling Chen<sup>1</sup>, Julie Ziobro<sup>2</sup>, Larissa Robinson-Cooper<sup>1</sup>, Samantha L. Hodges<sup>1</sup>, Yan Chen<sup>1</sup>, Nnamdi Edokobi<sup>1</sup>, Luis Lopez-Santiago<sup>1</sup>, Karl Habig<sup>1</sup>, Chloe Moore<sup>1</sup>, Joe Minton<sup>1</sup>, Sabrina Bramson<sup>1</sup>, Caroline Scheuing<sup>1</sup>, Noor Daddo<sup>5</sup>, Katalin Štěrbová<sup>3</sup>, Sarah Weckhuysen<sup>4,7,8,9</sup>, Jack M. Parent<sup>5,6,10</sup>, and Lori L. Isom<sup>1,5</sup>

Author affiliations:

<sup>1</sup>Department of Pharmacology, University of Michigan Medical School, Ann Arbor, MI 48109, USA

<sup>2</sup>Department of Pediatrics, University of Michigan Medical School, Ann Arbor, MI 48109, USA

<sup>3</sup>Department of Pediatric Neurology, Charles University and Motol Hospital, Prague, Czech Republic

<sup>4</sup>Applied&Translational Neurogenomics Group, VIB Center for Molecular Neurology, VIB, Antwerp, Belgium

<sup>5</sup>Department of Neurology, University of Michigan Medical School, Ann Arbor, MI 48109, USA

<sup>6</sup>Michigan Neuroscience Institute, University of Michigan Medical School, Ann Arbor, MI 48109, USA

<sup>7</sup>Translational Neurosciences, Faculty of Medicine and Health Science, University of Antwerp, Antwerp, Belgium

<sup>8</sup>Department of Neurology, Antwerp University Hospital, Antwerp, Belgium

<sup>9</sup>μNEURO Research Centre of Excellence, University of Antwerp, Antwerp, Belgium

<sup>10</sup>VA Ann Arbor Healthcare System, Ann Arbor, MI 49105, USA

**Supplementary Figures:**

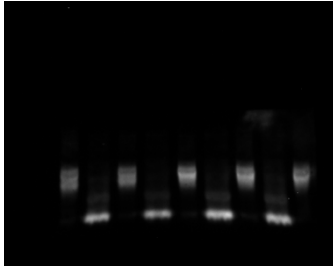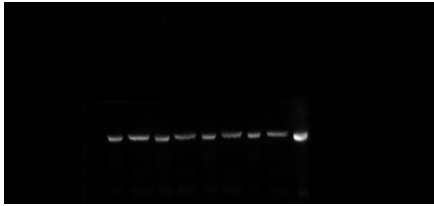

**Supplementary Figure 1.** Original, uncropped blots for Figure 1F.

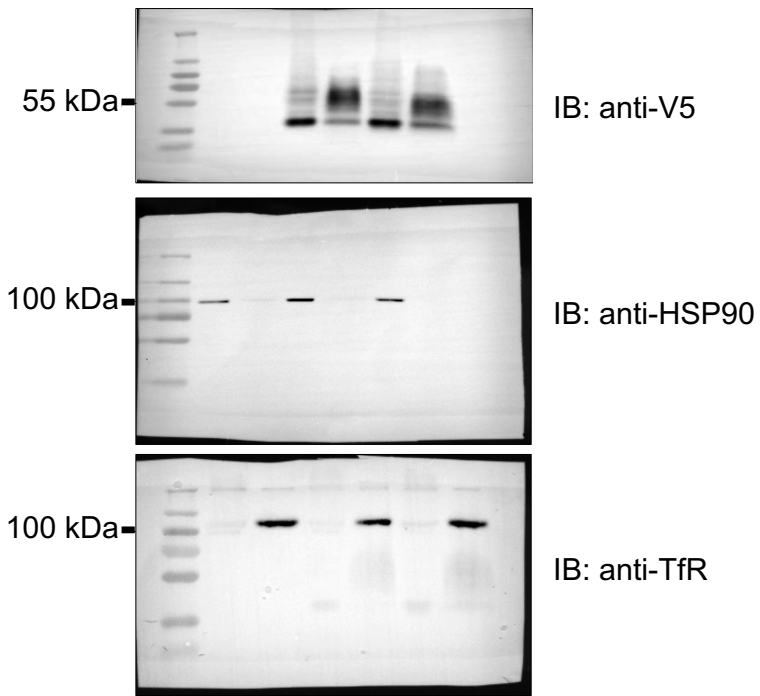

**Supplementary Figure 2.** Original, uncropped blots for Figure 2A.

IB: anti-V5 ( $\beta$ 1)

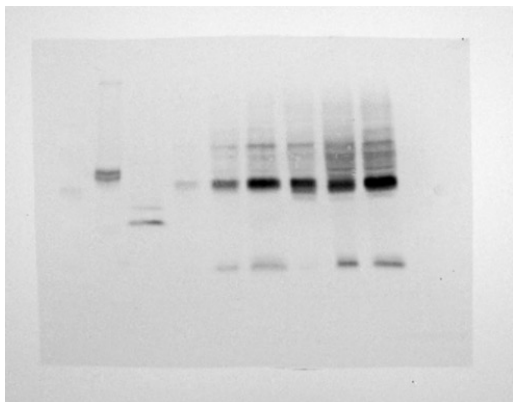

IB: anti- $\alpha$ -tubulin

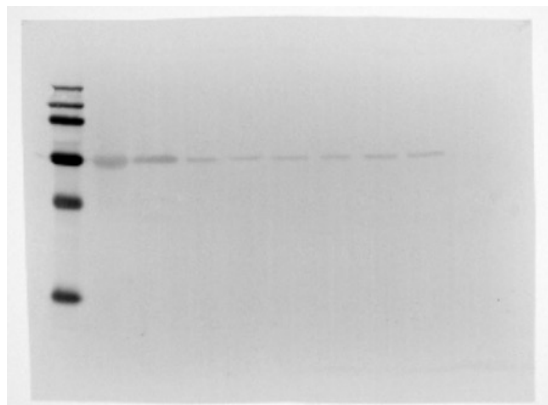

**Supplementary Figure 3:** Original, uncropped blots for Figure 2B.

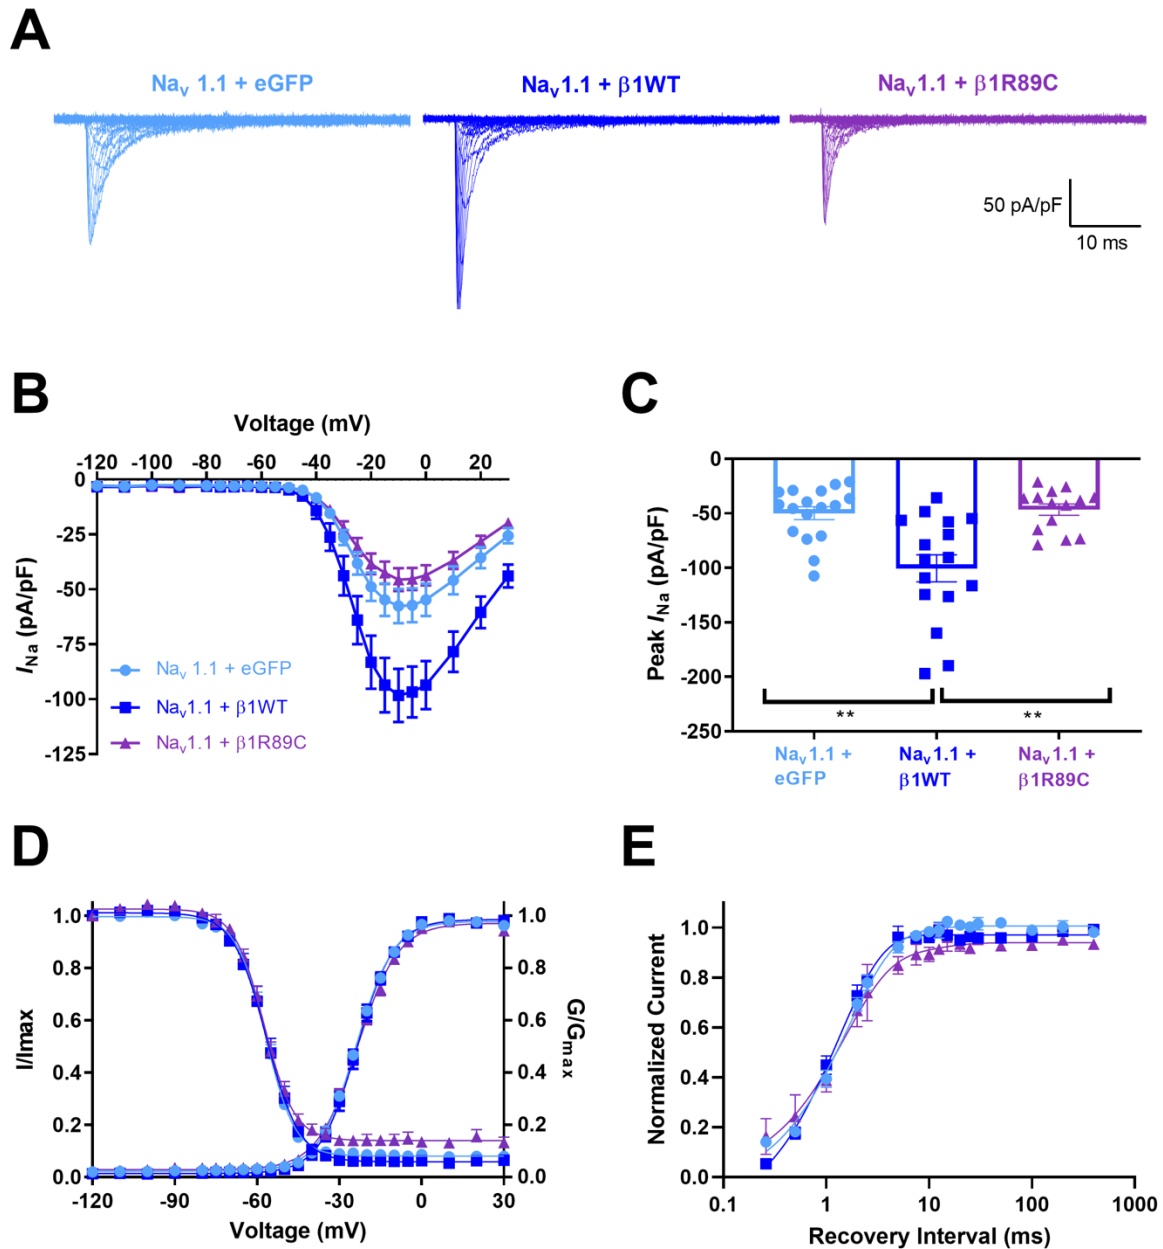

**Supplementary Figure 4.** β1-p.R89C does not modulate Nav1.1-generated  $I_{Na}$  density. HEK cells stably expressing human Nav1.1 were transiently co-transfected with β1-WT-V5-2AeGFP (dark blue) β1-p.R89C-V5-2AeGFP (purple), or eGFP (light blue). Cells transfected with eGFP were used as negative controls. (A) Representative  $I_{Na}$  density traces. (B) Nav1.1  $I_{Na}$  current-voltage relationship. (C)  $I_{Na}$  density was increased with co-expression of β1-WT but unchanged in the

presence of  $\beta 1$ -p.R89C. (D) No differences were observed in the mean voltage-dependent activation and inactivation curves. (E) Recovery from inactivation was expressed as the fraction of current produced by a second pulse over time following an identical pre-pulse. The data were fit to a double exponential function. Data in (B), (C), (D), and (E) are presented as means  $\pm$  SEM.  $**p < 0.01$  by a one-way ANOVA with Tukey's post-hoc comparison test. Dots represent individual cells.

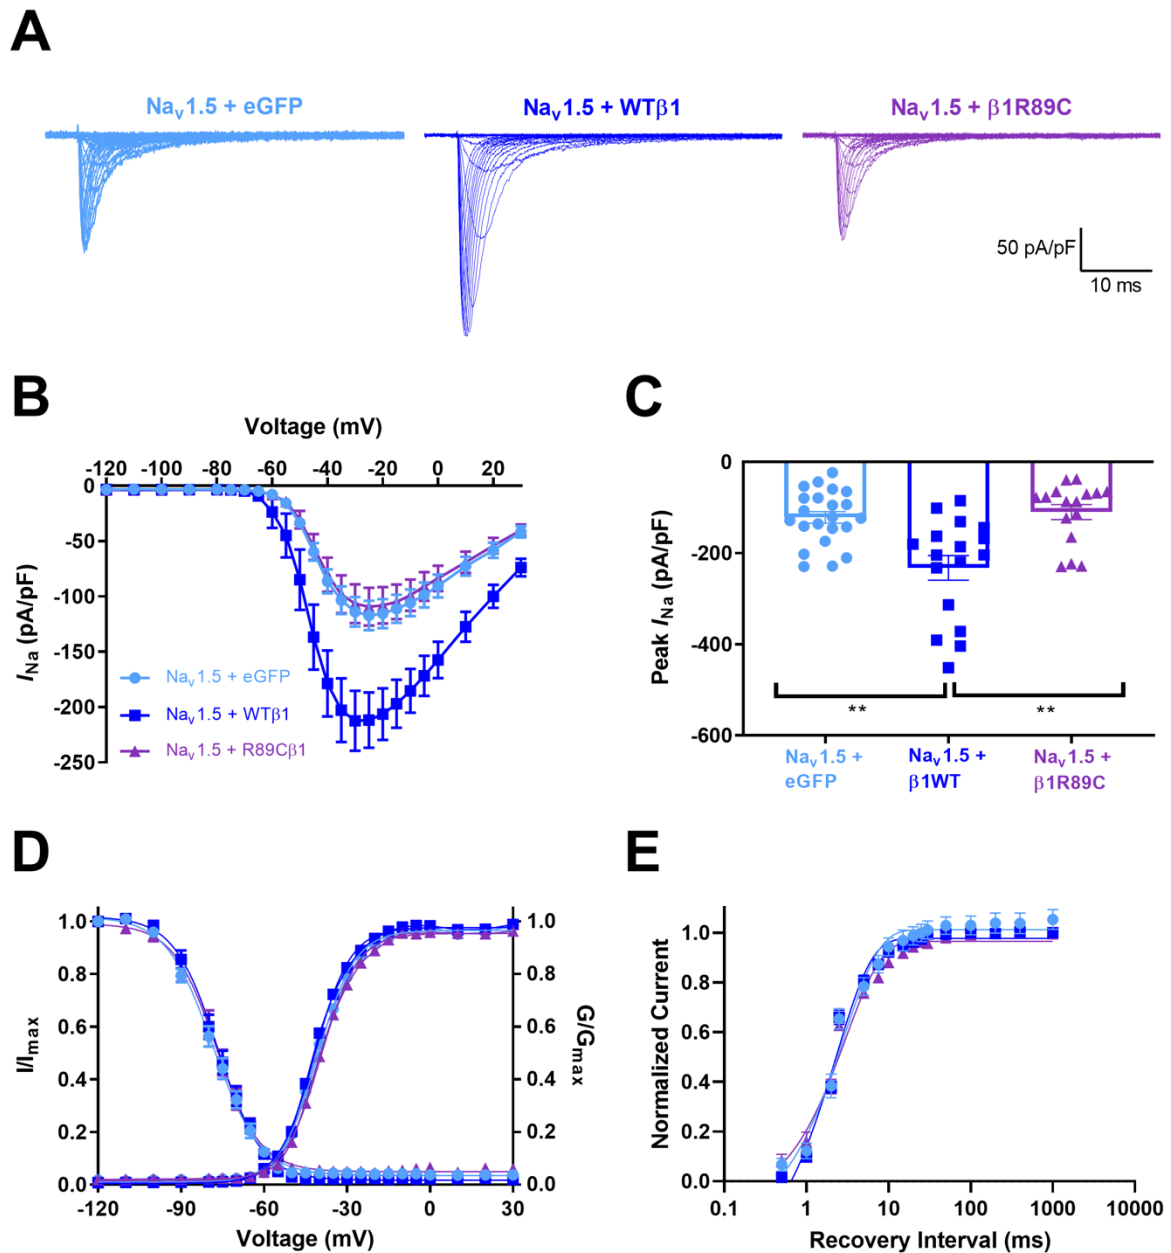

**Supplementary Figure 5.** β1-p.R89C does not modulate Na<sub>v</sub>1.5-generated  $I_{Na}$  density. HEK cells stably expressing human Na<sub>v</sub>1.5 were transiently co-transfected with β1-WT-V5-2AeGFP (dark blue) β1-p.R89C-V5-2AeGFP (purple), or eGFP (light blue). Cells transfected with eGFP were used as negative controls. (A) Representative  $I_{Na}$  density traces.  $I_{Na}$  was recorded in response to a series of voltage steps between -120 and +30mV in 5 mV increments, from a holding potential of

-120 mV for 200 msec. (B)  $\text{Na}_v1.5$   $I_{\text{Na}}$  current-voltage relationship. (C)  $I_{\text{Na}}$  density was increased with co-expression of  $\beta 1$ -WT but unchanged in the presence of  $\beta 1$ -p.R89C. (D) No differences were found in the mean voltage-dependent activation and inactivation curves. Data were obtained by fitting individual activation or inactivation curves to a Boltzmann equation. (E) A standard two pulse protocol was used to investigate the recovery from inactivation. Recovery from inactivation was expressed as the fraction of current produced by a second pulse over time following an identical pre-pulse. The data were fit to a double exponential function. Data in (B), (C), (D), and (E) are presented as means  $\pm$  SEM.  $**p < 0.01$  by a one-way ANOVA with Tukey's post-hoc comparison test. Dots represent individual cells.



## Supplementary Tables

| Nav1.5                                    | + eGFP            | + $\beta$ 1 WT     | + $\beta$ 1-p.R89C |
|-------------------------------------------|-------------------|--------------------|--------------------|
| <b>Voltage dependence of activation</b>   |                   |                    |                    |
| $V_{1/2}$ (mV)                            | $-40.61 \pm 0.24$ | $-41.78 \pm 0.39$  | $-39.50 \pm 0.24$  |
| $k$ (mV)                                  | $6.77 \pm 0.21$   | $6.53 \pm 0.34$    | $6.65 \pm 0.21$    |
| n                                         | 18                | 16                 | 14                 |
| <b>Voltage dependence of inactivation</b> |                   |                    |                    |
| $V_{1/2}$ (mV)                            | $-78.45 \pm 0.48$ | $-76.71 \pm 0.43$  | $-77.20 \pm 0.56$  |
| $h$ (mV)                                  | $-8.45 \pm 0.40$  | $-7.90 \pm 0.37$   | $-7.83 \pm 0.48$   |
| n                                         | 18                | 16                 | 14                 |
| <b>Recovery from Inactivation</b>         |                   |                    |                    |
| $\tau_{fast}$ (ms)                        | $7.55 \pm 0.78$   | $4.845 \pm 0.60^*$ | $4.932 \pm 0.51^*$ |
| n                                         | 9                 | 6                  | 7                  |

**Supplementary Table 1. Biophysical properties of  $I_{Na}$  expressed by Nav1.5.** Data are presented as means  $\pm$  sem.  $*p < 0.05$  versus + eGFP using a one-way Anova with Tukey's post-hoc comparison test.

| Nav1.1                                    | + eGFP            | + $\beta$ 1 WT    | + $\beta$ 1-p.R89C |
|-------------------------------------------|-------------------|-------------------|--------------------|
| <b>Voltage dependence of activation</b>   |                   |                   |                    |
| $V_{1/2}$ (mV)                            | $-23.90 \pm 0.18$ | $-23.51 \pm 0.28$ | $-23.34 \pm 0.26$  |
| $k$ (mV)                                  | $6.81 \pm 0.15$   | $6.78 \pm 0.24$   | $7.40 \pm 0.22$    |
| n                                         | 17                | 16                | 14                 |
| <b>Voltage dependence of inactivation</b> |                   |                   |                    |
| $V_{1/2}$ (mV)                            | $-56.86 \pm 0.25$ | $-56.61 \pm 0.40$ | $-57.40 \pm 0.40$  |
| $h$ (mV)                                  | $-5.32 \pm 0.22$  | $-6.07 \pm 0.35$  | $-5.52 \pm 0.35$   |
| n                                         | 17                | 16                | 14                 |
| <b>Recovery from Inactivation</b>         |                   |                   |                    |
| $\tau_{fast}$ (ms)                        | $1.17 \pm 0.14$   | $1.01 \pm 0.25$   | $1.05 \pm 0.18$    |
| n                                         | 8                 | 6                 | 6                  |

**Supplementary Table 2. Biophysical properties of  $I_{Na}$  expressed by Nav1.1.** Data are presented as means  $\pm$  sem. \* $p < 0.05$  versus + eGFP using a one-way Anova with Tukey's post-hoc comparison test.

| Nav1.6                                    | + eGFP            | + $\beta 1$ WT    | + $\beta 1$ -p.R89C |
|-------------------------------------------|-------------------|-------------------|---------------------|
| <b>Voltage dependence of activation</b>   |                   |                   |                     |
| $V_{1/2}$ (mV)                            | $-20.06 \pm 0.29$ | $-19.49 \pm 0.32$ | $-20.12 \pm 0.21$   |
| $k$ (mV)                                  | $6.36 \pm 0.26$   | $6.00 \pm 0.26$   | $5.91 \pm 0.26$     |
| n                                         | 15                | 11                | 17                  |
| <b>Voltage dependence of inactivation</b> |                   |                   |                     |
| $V_{1/2}$ (mV)                            | $-58.29 \pm 0.64$ | $-55.55 \pm 0.78$ | $-54.93 \pm 0.41$   |
| $h$ (mV)                                  | $-6.46 \pm 0.56$  | $-5.41 \pm 0.66$  | $-5.95 \pm 0.35$    |
| n                                         | 15                | 11                | 17                  |
| <b>Recovery from Inactivation</b>         |                   |                   |                     |
| $\tau_{fast}$ (ms)                        | $1.42 \pm 0.56$   | $0.93 \pm 0.24$   | $2.28 \pm 0.49$     |
| n                                         | 8                 | 8                 | 10                  |

**Supplementary Table 3. Biophysical properties of  $I_{Na}$  expressed by Nav1.6.** Data are presented as means  $\pm$  sem.  $*p < 0.05$  versus + eGFP using a one-way Anova with Tukey's post-hoc comparison test.
